# Supplementary material for: Targeting ribosome biogenesis as a novel therapeutic approach to overcome EMT-related chemoresistance in breast cancer
Source: eLife journal article supplement (doi:10.7554/elife.89486), 2023-10-17

**Figure 1B**, Western blot of EMT markers with flow sorted RFP+ (R), Doub+ (D), and GFP+ (G) Tri-PyMT cells.

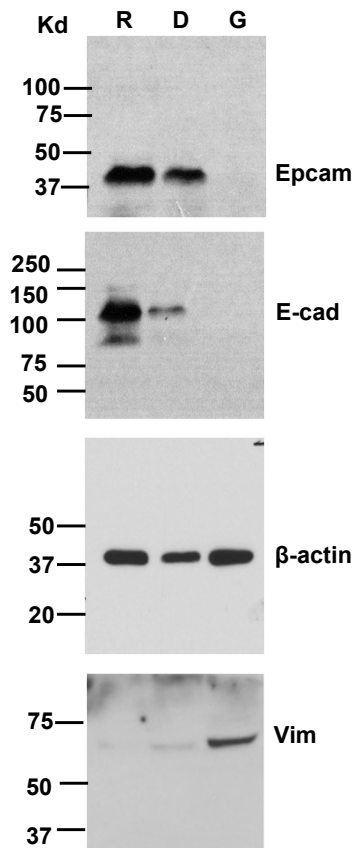

Supplement: fig1-data4 [file elife-89486-fig1-data4-v1.pdf]
