# Supplementary material for: Targeting ribosome biogenesis as a novel therapeutic approach to overcome EMT-related chemoresistance in breast cancer
Source: eLife journal article supplement (doi:10.7554/elife.89486), 2023-10-17

**Figure 4B**, Western blots of the epithelial marker (E-cad) and mesenchymal markers (Vim and Snail) in Tri-PyMT cells following a 5-day treatment with BMH21 (100nM) and CX5461 (20nM).

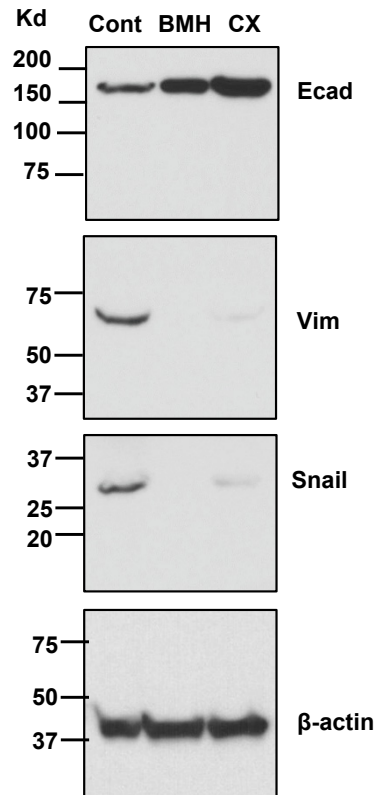

Supplement: fig4-data2 [file elife-89486-fig4-data2-v1.pdf]
