# Supplementary material for: Targeting ribosome biogenesis as a novel therapeutic approach to overcome EMT-related chemoresistance in breast cancer
Source: eLife journal article supplement (doi:10.7554/elife.89486), 2023-10-17

**Figure 4-figure supplement 2A**, Western blots show the knockdown expression of Rps24 and Rps28 in targeted Tri-PyMT cells.

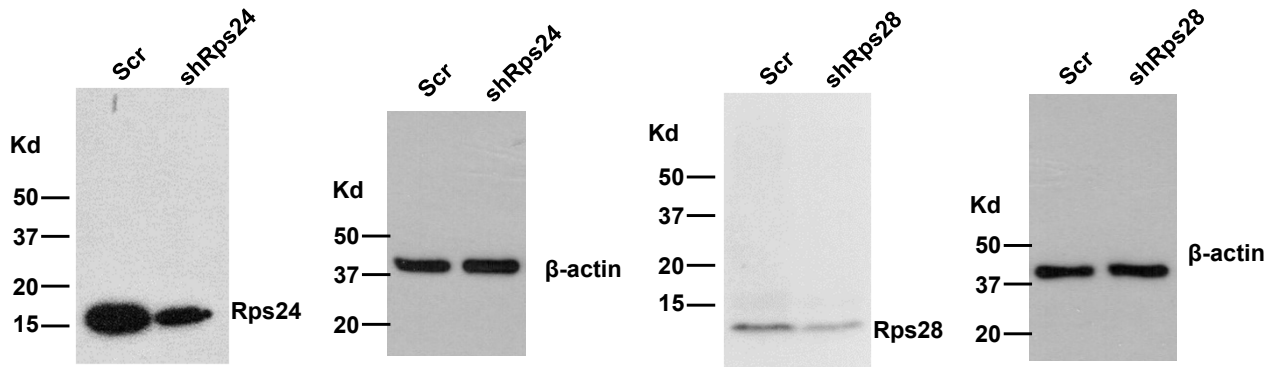

Supplement: fig4-figsupp2-data2 [file elife-89486-fig4-figsupp2-data2-v1.pdf]
